# Supplementary material for: A phosphorus-supported multisite coordination ligand containing three imidazolyl arms and its metalation behaviour. An unprecedented co-existence of mononuclear and macrocyclic dinuclear Zn(ii) complexes in the same unit cell of a crystalline lattice
Source: Royal Society of Chemistry journal article supplement (doi:10.1039/b807074a), 2008-01-01
Supplement: b807074a.pdf [file b807074a.pdf]

## Supporting information

**A phosphorus-supported multisite coordination ligand containing three imidazolyl arms and its metalation behaviour. An unprecedented co-existence of mononuclear and macrocyclic dinuclear Zn(II) complexes in the same unit cell of a crystalline lattice.**

Vadapalli Chandrasekhar,<sup>\*a</sup> Ramachandran Azhakar,<sup>a</sup> Balasubramanian Murugesu Pandian,<sup>a</sup> Ramamoorthy Boomishankar<sup>b</sup> and Alexander Steiner<sup>b</sup>

<sup>a</sup> *Department of Chemistry, Indian Institute of Technology Kanpur, Kanpur, India.*

*Fax: 91-512-2590007/2597436; Tel: 91-512-2597259; E-mail: [vc@iitk.ac.in](mailto:vc@iitk.ac.in)*

<sup>b</sup> *Department of chemistry, University of Liverpool, L69 7ZD, U.K.*

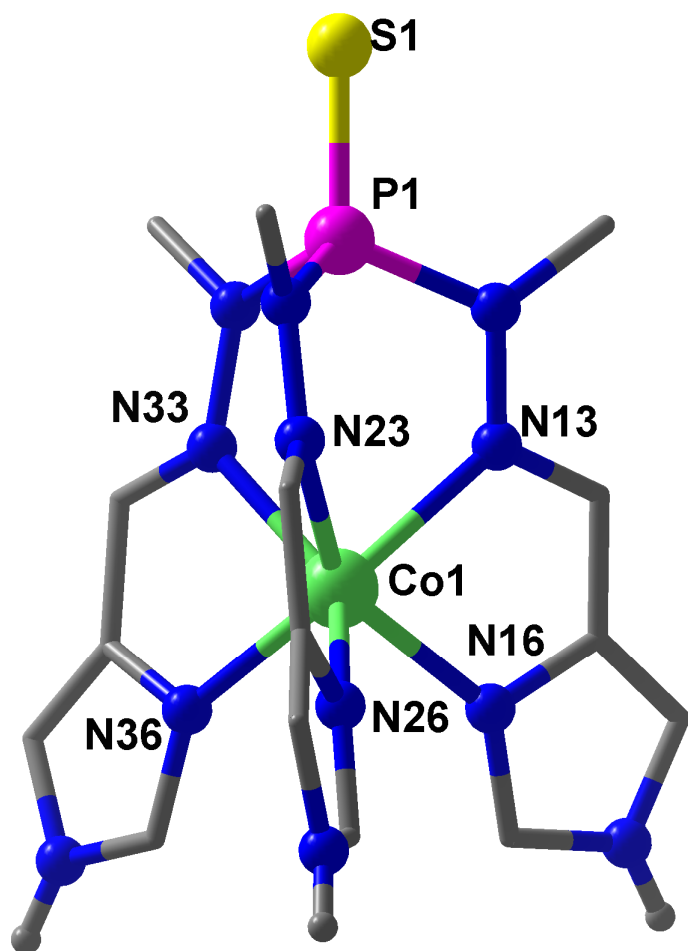

Figure S1: Diamond view of cationic portion of 2.

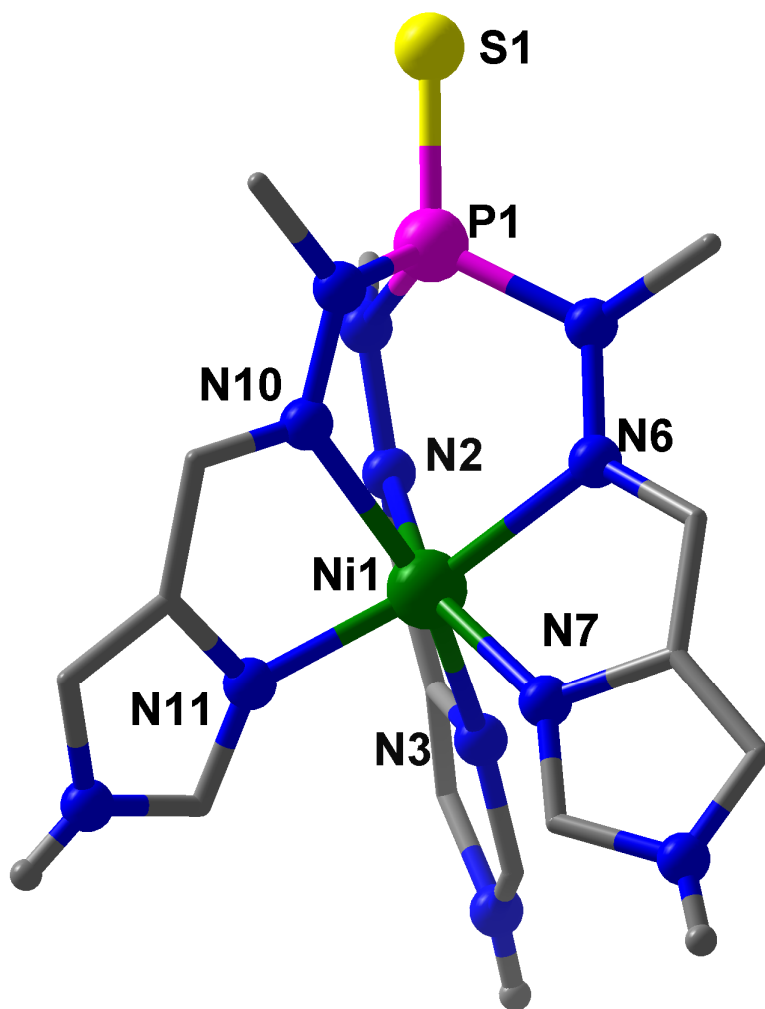

Figure S2: Diamond view of cationic portion of 3.

Table S1: Important hydrogen bonding bond parameters between imidazole hydrogen and nitrate oxygen.

|           | H---O (Å)  | N---O (Å)  | N-H-O (°)   | symmetry      |
|-----------|------------|------------|-------------|---------------|
| H4N---O5  | 2.3703(57) | 2.9434(45) | 116.70(56)  | -1+x, y, z    |
| H20N---O4 | 2.0139(83) | 2.8438(83) | 167.55(71)  | 1-x, 1-y, 1-z |
| H16N---O2 | 1.9166(68) | 2.7992(68) | 160.27(60)  | X, y, z       |
| H11N---O3 | 1.9541(58) | 2.8022(64) | 165.86 (47) | 1-x, y, z     |

### Sheffield ChemPuter

#### Result of isotope pattern calculation

Formula:  $P_1S_1N_{12}H_{20}C_{15}Zn_1$

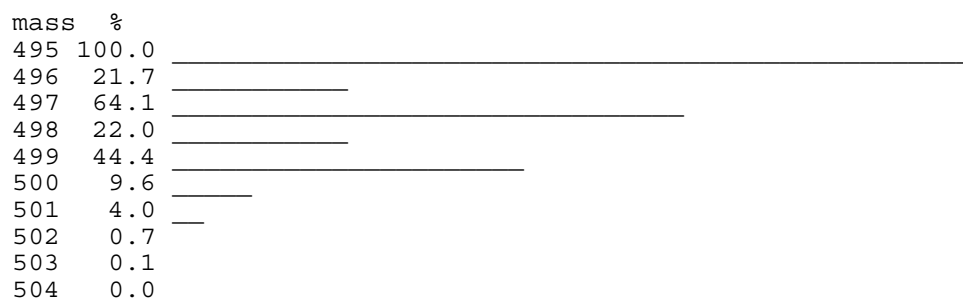

**Figure S3:** Sheffield chemputer generated isotopic pattern for  $[M-2HNO_3+H^+]$

### Sheffield ChemPuter

#### Result of isotope pattern calculation

Formula:  $P_2S_2N_{24}H_{39}C_{30}Zn_2$

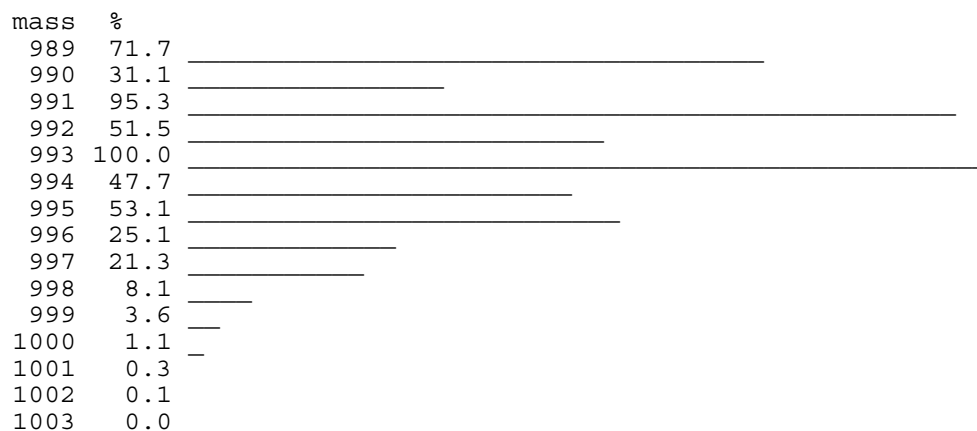

**Figure S4:** Sheffield chemputer generated isotopic pattern for  $[M-4HNO_3+H^+]$
